# Supplementary material for: Gene Expression Profiles Identify Biomarkers of Resistance to Decitabine in Myelodysplastic Syndromes
Source: MDPI journal article supplement (doi:10.3390/cells10123494), 2021-12-10
Supplement: s1 [file s1]

**Table S1. qRT-PCR primer sequences for the verification of candidate DEGs.**

| Gene name |     | Primer Sequences          | Accession No. | Product size |
|-----------|-----|---------------------------|---------------|--------------|
| AKT3      | (F) | TCCAGGCTGTAGCAGACAGA      | NM_181690     | 399          |
|           | (R) | AAAACAGCTCGCCCCCATTA      |               |              |
| AMER1     | (F) | CCCACACTTGGGAAGCTCAT      | NM_152424     | 464          |
|           | (R) | CACAGTGGCATTCCCTTCCT      |               |              |
| BCL2      | (F) | AGAGGGGCTACGAGTGGGAT      | NM_000657     | 415          |
|           | (R) | TTGACGCTCTCCACACACAT      |               |              |
| BCL2A1    | (F) | CTGCAGTGCCTACAGAT         | NM_004049     | 293          |
|           | (R) | GTATCCACATCCGGGGCAAT      |               |              |
| CDKN1A    | (F) | GCGACTGTGATGCGCTAATG      | NM_000389     | 353          |
|           | (R) | ATCTGTCATGCTGGTCTGCC      |               |              |
| CDKN2A    | (F) | ACCGAATAGTTACGGTCGGAG     | NM_001195132  | 376          |
|           | (R) | CCTGCTTCTACAAACCCACAA     |               |              |
| CDKN2D    | (F) | CGCTGCAGGTCATGATGTTT      | NM_001800     | 156          |
|           | (R) | CGTGCTCCACTAGGACCTTC      |               |              |
| CR1       | (F) | CCCACATCCACCCAAGATCC      | NM_000573     | 548          |
|           | (R) | TTGTTTGCAGAGTTCGGGGA      |               |              |
| DLC1      | (F) | ACGCAATTCTTCCAGCTCCA      | NM_001348081  | 276          |
|           | (R) | TCGTTGTCCACATCCAGGT       |               |              |
| DNMT1     | (F) | ATGAGCAGCCCATCTTCCTG      | BC126227      | 399          |
|           | (R) | CCTCATCGTCATCTGCCTCC      |               |              |
| EGF       | (F) | CCTGAAGGCTCAGTGCTTGA      | NM_001963     | 333          |
|           | (R) | CTTCAGGGCTGTATGGGCAA      |               |              |
| ETS1      | (F) | TCCCCTCCCCGGGTAAACTC      | NM_001162422  | 231          |
|           | (R) | CCTTATTGAGGTCAGCACGGT     |               |              |
| FGF11     | (F) | CCTCATCCTGCTGTCCAAGG      | NM_004112     | 305          |
|           | (R) | AGCGACACTCAGCTGTGAAA      |               |              |
| FOS       | (F) | TACTACCACTCACCCGCAGA      | NM_005252     | 474          |
|           | (R) | CAGGTTGGCAATCTCGGTCT      |               |              |
| GFI1      | (F) | GAACGGAGCTCGGAGTTTGA      | NM_005263     | 988          |
|           | (R) | CCACCTTCCTCTGGAAACCC      |               |              |
| GNA11     | (F) | AGTGCCATCAAGACCCTGTG      | NM_002067     | 547          |
|           | (R) | TCTTCAGGATGAACTCCCGC      |               |              |
| HSPA2     | (F) | GAGCTCAATGCCGACCTCTT      | NM_021979     | 407          |
|           | (R) | AGTACGCTGCTCTGGTTGTC      |               |              |
| ID1       | (F) | CTGGACGAGCAGCAGGTAAA      | NM_002165     | 300          |
|           | (R) | TCAGCGACACAAGATGCGAT      |               |              |
| ID2       | (F) | TGAAAGCCTTCAGTCCCGTG      | NM_002166     | 271          |
|           | (R) | TGGTGATGCAGGCTGACAAT      |               |              |
| IL12B     | (F) | GTCACAAAGGAGGCGAGGTT      | NM_002187     | 160          |
|           | (R) | CAGCAGGTGAAACGTCCAGA      |               |              |
| ITGA9     | (F) | GACCGCGATGATGAGTGGAT      | NM_002207     | 436          |
|           | (R) | CATCAATGGTGGACGGGTGA      |               |              |
| KL        | (F) | GTGGCCGAGAGAGTTTTGGA      | AB005141      | 359          |
|           | (R) | GGGAGGTCTCCGTACTTGAA      |               |              |
| KMT2E     | (F) | TCCTGGAGAAAAGGAACCTGC     | AF519459      | 318          |
|           | (R) | GTTTCCATAAACATGCCTCTGGTGT |               |              |

|           |                                                         |                |     |
|-----------|---------------------------------------------------------|----------------|-----|
| LIG4      | (F) TGTGCAGTAGCAGAGAAGCC<br>(R) TGTTCTAGGTCGTCCAGGGT    | NM_002312      | 350 |
| LMX1B     | (F) AGAGACACTGGCAGCTGA<br>(R) TCGTTCCCTGGCATTGTTGGG     | NM_002316      | 291 |
| MAPK10    | (F) TTCACACCCCAGAAAACGCT<br>(R) CTTGGGCCGATTCTCCACAT    | NM_002753      | 522 |
| MET       | (F) CGCACAAAGCAAGCCAGATT<br>(R) GAGGCATTGACTGCAGGACT    | NM_000245      | 553 |
| MLF1      | (F) TCCATTCTTGCACACCGAGA<br>(R) TGGAGCTCGACGAGTTTGAG    | NM_022443      | 351 |
| NFKB1     | (F) GGGCACTGGAAGTACAGGTC<br>(R) TCCTGCACAGCAGTGAGATG    | NM_003998.2    | 435 |
| NOTCH1    | (F) TGCACACTATTCTGCCCCAG<br>(R) ACTTGAAGGCCTCCGGAATG    | NM_017617      | 309 |
| PRKAA2    | (F) TCTTCTTTGTGGCACCCCTCC<br>(R) ATAAGCCACTGCAAGCTGGT   | NM_006252      | 355 |
| RELN      | (F) TGGCTATTACCCCCGCTTTT<br>(R) ACGTGAGAGGCTACCACACT    | NM_005045.2    | 318 |
| RUNX1T1   | (F) TGCAGCAGTTTGGCAATGAC<br>(R) TGGTTCTGTCTGGAGTTCGC    | NM_004349      | 348 |
| SHH       | (F) TCCACTGCTCGGTGAAAGCAG<br>(R) AGCTGTGCTCCTCGATGACC   | NM_000193      | 674 |
| SPP1      | (F) GAATCTCCTAGCCCCACAGACC<br>(R) TGTGAGGTGATGTCCTCGTCT | NM_000582      | 378 |
| STAT3     | (F) TCAAGAGTCAAGGAGACATG<br>(R) AGTCTTTGTCAATGCACACT    | NM_213662      | 579 |
| TNFRSF10B | (F) AACAAAAGAGGTCCAGCCCC<br>(R) TCCCCACTGTGCTTTGTACC    | NM_003842.3    | 361 |
| TUBB3     | (F) TCACTACACGGAGGGGGCGG<br>(R) CGGGAAGCGCAAGGAGGTGG    | NM_006086.3    | 418 |
| GAPDH     | (F) AAGGACTCATGACCACAGTC<br>(R) TTCAGCTCAGGGATGACCTT    | NM_001289745.2 | 160 |

---
