# Supplementary material for: Gene Expression Profiles Identify Biomarkers of Resistance to Decitabine in Myelodysplastic Syndromes
Source: MDPI journal article supplement (doi:10.3390/cells10123494), 2021-12-10
Supplement: s1 [file s1]

**Table S4. DEGs between F-36P and F-36P/DEC cells.**

|    | Gene Name | Accession Number | Description                                                            |
|----|-----------|------------------|------------------------------------------------------------------------|
| 1  | AKT3      | NM_181690        | V-akt murine thymoma viral oncogene homolog 3                          |
| 2  | AMER1     | NM_152424        | Wilms tumor gene on the X chromosome protein                           |
| 3  | BCL2      | NM_000657        | Apoptosis regulator Bcl-2                                              |
| 4  | BCL2A1    | NM_004049        | Hemopoietic-specific early response protein                            |
| 5  | BCL2L11   | NM_207002        | Bcl2-interacting mediator of cell death                                |
| 6  | CDKN1A    | NM_000389        | Cyclin-dependent kinase inhibitor 1A                                   |
| 7  | CDKN2A    | NM_001195132     | Cyclin-dependent kinase 4 inhibitor A                                  |
| 8  | CDKN2D    | NM_001800        | Cyclin-dependent kinase inhibitor 2D                                   |
| 9  | CREB3L4   | NM_130898        | Cyclic AMP-responsive element-binding protein 3-like protein 4         |
| 10 | DUSP6     | BC_037236        | Mitogen-activated protein kinase phosphatase 3                         |
| 11 | EGF       | NM_001963        | Pro-epidermal growth factor                                            |
| 12 | EPO       | NM_000799.2      | Erythropoietin                                                         |
| 13 | ETS1      | NM_001162422     | V-ets avian erythroblastosis virus E26 oncogene homolog 1              |
| 14 | FGF1      | NM_033137.1      | Fibroblast growth factor 1                                             |
| 15 | FGF11     | NM_004112        | Fibroblast growth factor homologous factor 3                           |
| 16 | FOS       | NM_005252        | FBJ murine osteosarcoma viral oncogene homolog                         |
| 17 | FZD7      | NM_003507        | Frizzled class receptor 7                                              |
| 18 | GFI1      | NM_005263        | Growth factor independent 1 transcription repressor                    |
| 19 | GNA11     | NM_002067        | Guanine nucleotide binding protein, alpha 11                           |
| 20 | HMGA1     | NM_145904        | High mobility group protein HMG-I/HMG-Y                                |
| 21 | HSPA2     | NM_021979        | Heat shock-related 70 kDa protein 2                                    |
| 22 | ID1       | NM_002165        | Inhibitor of DNA binding 1, dominant negative helix-loop-helix protein |
| 23 | ID2       | NM_002166        | Inhibitor of DNA binding 2, dominant negative helix-loop-helix protein |
| 24 | IFNA17    | NM_021268        | Interferon, alpha 17                                                   |
| 25 | IL11RA    | NM_147162        | Interleukin-11 receptor subunit alpha                                  |
| 26 | IL12B     | NM_002187        | Cytotoxic lymphocyte maturation factor 40 kDa subunit                  |
| 27 | ITGA1     | NM_181501        | CD49 antigen-like family member A                                      |
| 28 | ITGA6     | NM_000210        | CD49 antigen-like family member F                                      |
| 29 | ITGA9     | NM_002207        | Integrin alpha-RLC                                                     |
| 30 | KL        | AB_005141        | Klotho                                                                 |
| 31 | KMT2E     | AF_519459        | Myeloid/lymphoid or mixed-lineage leukemia protein 5                   |
| 32 | LMX1B     | NM_002316        | LIM homeobox transcription factor 1, beta                              |

|    |           |              |                                                                                    |
|----|-----------|--------------|------------------------------------------------------------------------------------|
| 33 | LTBP1     | NM_000627    | Latent transforming growth factor beta binding protein 1                           |
| 34 | MAPK10    | NM_002753    | Stress-activated protein kinase JNK3                                               |
| 35 | MCL1      | AF_118124    | Induced myeloid leukemia cell differentiation protein Mcl1                         |
| 36 | MECOM     | NM_005241    | Ecotropic virus integration site 1 protein homolog                                 |
| 37 | MET       | NM_000245    | MET proto-oncogene, receptor tyrosine kinase                                       |
| 38 | NFATC1    | NM_172389    | Nuclear factor of activated T-cells, cytoplasmic, calcineurin-dependent 1          |
| 39 | NFKB1     | NM_003998.2  | Nuclear factor of kappa light polypeptide gene enhancer in B-cells 1               |
| 40 | NFKBIZ    | NM_001005474 | Nuclear factor of kappa light polypeptide gene enhancer in B-cells inhibitor, zeta |
| 41 | NOTCH1    | NM_017617    | Translocation-associated notch protein TAN-1                                       |
| 42 | PRKAA2    | NM_006252    | 5'-AMP-activated protein kinase catalytic subunit alpha-2                          |
| 43 | PTPRR     | NM_001207015 | Protein tyrosine phosphatase, receptor type, R                                     |
| 44 | RELN      | NM_005045.2  | Reelin                                                                             |
| 45 | RPS6KA5   | NM_004755    | Nuclear mitogen- and stress-activated protein kinase 1                             |
| 46 | RUNX1T1   | NM_004349    | Runt-related transcription factor 1                                                |
| 47 | SHH       | NM_000193    | Shh unprocessed N-terminal signaling and C-terminal autoprocessing domains         |
| 48 | SPP1      | NM_000582    | Secreted phosphoprotein 1                                                          |
| 49 | SPRY2     | NM_005842    | Sprouty homolog 2                                                                  |
| 50 | STAT3     | NM_213662    | Signal transducer and activator of transcription 3                                 |
| 51 | TNFRSF10B | NM_003842.3  | Tumor necrosis factor receptor superfamily, member 10b                             |
| 52 | TUBB3     | NM_006086.3  | Tubulin, beta 3 class III                                                          |
| 53 | WNT3      | NM_030753    | Wingless-type MMTV integration site family, member 3                               |
| 54 | WNT5A     | NM_003392    | Wingless-type MMTV integration site family, member 5A                              |

---
