# Supplementary material for: Gene Expression Profiles Identify Biomarkers of Resistance to Decitabine in Myelodysplastic Syndromes
Source: MDPI journal article supplement (doi:10.3390/cells10123494), 2021-12-10
Supplement: s1 [file s1]

**Table S3. The 30 most differentially expressed genes from the volcano plot.**

| No. | Gene Name | Log <sub>2</sub><br>fold<br>change | P-value | Gene sets                                             |
|-----|-----------|------------------------------------|---------|-------------------------------------------------------|
| 1   | RELN      | 3.86                               | 0.000   | PI3K                                                  |
| 2   | MET       | 2.27                               | 0.015   | Driver Gene, PI3K, Ras, Transcriptional Misregulation |
| 3   | PTPRR     | 2.25                               | 0.005   | MAPK                                                  |
| 4   | PLA2G4C   | 1.98                               | 0.009   | MAPK, Ras                                             |
| 5   | MECOM     | 1.93                               | 0.018   | MAPK                                                  |
| 6   | BCL2A1    | 1.61                               | 0.037   | Transcriptional Misregulation                         |
| 7   | HES1      | 1.46                               | 0.005   | Notch                                                 |
| 8   | AKT3      | 1.40                               | 0.003   | Cell Cycle - Apoptosis, JAK-STAT, MAPK, PI3K, Ras     |
| 9   | HSPA6     | 1.30                               | 0.036   | MAPK                                                  |
| 10  | CCNB3     | 1.21                               | 0.003   | Cell Cycle - Apoptosis                                |
| 11  | DDIT4     | 1.21                               | 0.011   | PI3K                                                  |
| 12  | LTBP1     | 1.14                               | 0.025   | TGF-beta                                              |
| 13  | WNT6      | 1.13                               | 0.041   | Hedgehog, Wnt                                         |
| 14  | EGF       | 1.09                               | 0.032   | MAPK, PI3K, Ras                                       |
| 15  | SMAD3     | 1.01                               | 0.003   | Cell Cycle - Apoptosis, TGF-beta, Wnt                 |
| 16  | CASP7     | 1.01                               | 0.014   | Cell Cycle - Apoptosis                                |
| 17  | IL1RAP    | 1.00                               | 0.032   | Cell Cycle - Apoptosis                                |
| 18  | DUSP5     | -1.01                              | 0.022   | MAPK                                                  |
| 19  | ITGA6     | -1.03                              | 0.006   | PI3K                                                  |
| 20  | CACNB4    | -1.19                              | 0.028   | MAPK                                                  |
| 21  | FGFR3     | -1.32                              | 0.006   | Driver Gene, MAPK, PI3K, Ras                          |
| 22  | LAMA5     | -1.33                              | 0.005   | PI3K                                                  |
| 23  | SPP1      | -1.36                              | 0.015   | PI3K                                                  |
| 24  | PPP2R2C   | -1.44                              | 0.001   | PI3K                                                  |
| 25  | CEBPA     | -1.53                              | 0.003   | Driver Gene, Transcriptional Misregulation            |
| 26  | IL8       | -1.63                              | 0.002   | Transcriptional Misregulation                         |
| 27  | THBS1     | -1.83                              | 0.002   | PI3K, TGF-beta                                        |
| 28  | TNFRSF10D | -1.88                              | 0.012   | Cell Cycle - Apoptosis                                |
| 29  | BDNF      | -2.06                              | 0.004   | MAPK                                                  |
| 30  | FST       | -2.42                              | 0.000   | TGF-beta                                              |

All expression were performed in triplicate, and value are significant at the  $p < 0.05$  level.
