# Supplementary material for: Gene Expression Profiles Identify Biomarkers of Resistance to Decitabine in Myelodysplastic Syndromes
Source: MDPI journal article supplement (doi:10.3390/cells10123494), 2021-12-10
Supplement: s1 [file s1]

**Table S2. 189 differentially expressed genes from a cluster heatmap.**

| No. | Gene Name | Description                                                                            |
|-----|-----------|----------------------------------------------------------------------------------------|
| 1   | RELN      | Reelin                                                                                 |
| 2   | CACNA2D1  | Calcium channel, voltage-dependent, alpha 2/delta subunit 1                            |
| 3   | SMC1B     | Structural maintenance of chromosomes protein 1B                                       |
| 4   | PTPRR     | Protein tyrosine phosphatase, receptor type, R                                         |
| 5   | TNFRSF10B | Tumor necrosis factor receptor superfamily, member 10b                                 |
| 6   | IL2RB     | High affinity IL-2 receptor subunit beta                                               |
| 7   | MAPK8IP2  | Mitogen-activated protein kinase 8 interacting protein 2                               |
| 8   | CRLF2     | Thymic stromal lymphopoietin protein receptor                                          |
| 9   | SFRP2     | Secreted apoptosis-related protein 1                                                   |
| 10  | MET       | MET proto-oncogene, receptor tyrosine kinase                                           |
| 11  | ITGB8     | Integrin, beta 8                                                                       |
| 12  | HMGA2     | High mobility group AT-hook protein 2                                                  |
| 13  | MAPK8IP1  | Mitogen-activated protein kinase 8 interacting protein 1                               |
| 14  | MECOM     | Ecotropic virus integration site 1 protein homolog                                     |
| 15  | FZD10     | Frizzled class receptor 10                                                             |
| 16  | GATA3     | Trans-acting T-cell-specific transcription factor GATA-3                               |
| 17  | LEFTY2    | Endometrial bleeding-associated factor                                                 |
| 18  | BCL2A1    | Hemopoietic-specific early response protein                                            |
| 19  | MMP9      | Matrix metalloproteinase 9 (gelatinase B, 92kDa gelatinase, 92kDa type IV collagenase) |
| 20  | CACNG6    | Neuronal voltage-gated calcium channel gamma-6 subunit                                 |
| 21  | CACNA2D2  | Calcium channel, voltage-dependent, alpha 2/delta subunit 2                            |
| 22  | IL1R2     | CD121 antigen-like family member B                                                     |
| 23  | GLI3      | Transcriptional activator GLI3                                                         |
| 24  | HES1      | Class B basic helix-loop-helix protein 39                                              |
| 25  | PLA2G4C   | Phospholipase A2, group IVC (cytosolic, calcium-independent)                           |
| 26  | GRIA3     | Glutamate receptor, ionotropic, AMPA 3                                                 |
| 27  | PRL       | Prolactin                                                                              |
| 28  | SETBP1    | SET binding protein 1                                                                  |
| 29  | AKT3      | V-akt murine thymoma viral oncogene homolog 3                                          |
| 30  | CCR7      | Epstein-Barr virus-induced G-protein coupled receptor 1                                |
| 31  | LRP2      | Low density lipoprotein receptor-related protein 2                                     |
| 32  | COL24A1   | Collagen alpha-1(XXIV) chain                                                           |
| 33  | RASGRF2   | Ras protein-specific guanine nucleotide-releasing factor 2                             |
| 34  | RNF43     | RING-type E3 ubiquitin transferase RNF43                                               |
| 35  | TSHR      | Thyroid stimulating hormone receptor                                                   |
| 36  | WIF1      | WNT inhibitory factor 1                                                                |
| 37  | PPP3R2    | Protein phosphatase 3 regulatory subunit B beta isoform                                |
| 38  | MPO       | Myeloperoxidase                                                                        |
| 39  | NTF3      | Nerve growth factor 2                                                                  |
| 40  | PROM1     | Prominin-like protein 1                                                                |
| 41  | DTX1      | RING-type E3 ubiquitin transferase DTX1                                                |

|    |         |                                                                            |
|----|---------|----------------------------------------------------------------------------|
| 42 | NTRK2   | Neurotrophic tyrosine kinase, receptor, type 2                             |
| 43 | BCL2    | Apoptosis regulator Bcl-2                                                  |
| 44 | DDIT4   | Protein regulated in development and DNA damage response 1                 |
| 45 | NODAL   | Nodal growth differentiation factor                                        |
| 46 | IL20RA  | Interleukin-20 receptor subunit alpha                                      |
| 47 | IL12B   | Cytotoxic lymphocyte maturation factor 40 kDa subunit                      |
| 48 | IGFBP3  | Insulin-like growth factor binding protein 3                               |
| 49 | ETS1    | V-ets avian erythroblastosis virus E26 oncogene homolog 1                  |
| 50 | INHBA   | Erythroid differentiation protein                                          |
| 51 | SFN     | Epithelial cell marker protein 1                                           |
| 52 | HSPA2   | Heat shock-related 70 kDa protein 2                                        |
| 53 | LAMB4   | Laminin beta-1-related protein                                             |
| 54 | LAMC3   | Laminin-12 subunit gamma                                                   |
| 55 | KMT2E   | Myeloid/lymphoid or mixed-lineage leukemia protein 5                       |
| 56 | NGFR    | Tumor necrosis factor receptor superfamily member 16                       |
| 57 | TCF7L1  | Transcription factor 7-like 1 (T-cell specific, HMG-box)                   |
| 58 | NOTCH1  | Translocation-associated notch protein TAN-1                               |
| 59 | PDGFB   | Platelet-derived growth factor beta polypeptide                            |
| 60 | KL      | Klotho                                                                     |
| 61 | TPO     | Thyroid peroxidase                                                         |
| 62 | ID2     | Inhibitor of DNA binding 2, dominant negative helix-loop-helix protein     |
| 63 | FGF23   | Tumor-derived hypophosphatemia-inducing factor                             |
| 64 | DLC1    | StAR-related lipid transfer protein 12                                     |
| 65 | HPGD    | Short chain dehydrogenase/reductase family 36C member 1                    |
| 66 | CR1     | Complement component (3b/4b) receptor 1 (Knops blood group)                |
| 67 | LTBP1   | Latent transforming growth factor beta binding protein 1                   |
| 68 | RUNX1T1 | Runt-related transcription factor 1                                        |
| 69 | NOTCH3  | Neurogenic locus notch homolog protein 3                                   |
| 70 | TUBB3   | Tubulin, beta 3 class III                                                  |
| 71 | IRS1    | Insulin receptor substrate 1                                               |
| 72 | SHH     | Shh unprocessed N-terminal signaling and C-terminal autoprocessing domains |
| 73 | DKK2    | Dickkopf WNT signaling pathway inhibitor 2                                 |
| 74 | CDKN1A  | Cyclin-dependent kinase inhibitor 1A (p21, Cip1)                           |
| 75 | TNN     | Tenascin N                                                                 |
| 76 | AMER1   | Wilms tumor gene on the X chromosome protein                               |
| 77 | SSX1    | Synovial sarcoma, X breakpoint 1                                           |
| 78 | LMX1B   | LIM homeobox transcription factor 1, beta                                  |
| 79 | COL27A1 | Collagen alpha-1(XXVII) chain                                              |
| 80 | PITX2   | RIEG bicoid-related homeobox transcription factor                          |
| 81 | GFI1    | Growth factor independent 1 transcription repressor                        |
| 82 | PRMT8   | Heterogeneous nuclear ribonucleoprotein methyltransferase-like protein 4   |
| 83 | MAPT    | Microtubule-associated protein tau                                         |

|     |         |                                                                                  |
|-----|---------|----------------------------------------------------------------------------------|
| 84  | LAMA1   | Laminin subunit alpha-1                                                          |
| 85  | CALML3  | Calmodulin-related protein NB-1                                                  |
| 86  | WNT6    | Wingless-type MMTV integration site family, member 6                             |
| 87  | EGF     | Pro-epidermal growth factor                                                      |
| 88  | CEBPE   | CCAAT/enhancer binding protein (C/EBP), epsilon                                  |
| 89  | FGF21   | Fibroblast growth factor 21                                                      |
| 90  | SMAD3   | Mothers against decapentaplegic homolog 3                                        |
| 91  | WNT2    | Wingless-type MMTV integration site family member 2                              |
| 92  | APH1B   | Presenilin-stabilization factor-like                                             |
| 93  | GDF6    | Growth/differentiation factor 16                                                 |
| 94  | SMAD9   | Mothers against decapentaplegic homolog 9                                        |
| 95  | CASP7   | Caspase 7, apoptosis-related cysteine peptidase                                  |
| 96  | COL4A4  | Collagen alpha-4(IV) chain                                                       |
| 97  | PPP2R2B | Serine/threonine-protein phosphatase 2A 55 kDa regulatory subunit B beta isoform |
| 98  | FGF3    | Heparin-binding growth factor 3                                                  |
| 99  | PLAT    | Tissue-type plasminogen activator                                                |
| 100 | IL1RAP  | Interleukin 1 receptor accessory protein                                         |
| 101 | CALML5  | Calmodulin-like skin protein                                                     |
| 102 | CACNA1C | Calcium channel, L type, alpha-1 polypeptide, isoform 1, cardiac muscle          |
| 103 | CCNB3   | G2/mitotic-specific cyclin-B3                                                    |
| 104 | FN1     | Fibronectin type III domain containing                                           |
| 105 | IL12A   | Cytotoxic lymphocyte maturation factor 35 kDa subunit                            |
| 106 | FLT1    | Vascular endothelial growth factor receptor 1                                    |
| 107 | IL6     | B-cell stimulatory factor 2                                                      |
| 108 | ETV7    | ETS translocation variant 7                                                      |
| 109 | IFNA7   | Interferon alpha-J1                                                              |
| 110 | NUMBL   | Numb homolog (Drosophila)-like                                                   |
| 111 | CDKN2A  | Cyclin-dependent kinase 4 inhibitor A                                            |
| 112 | FGFR4   | Fibroblast growth factor receptor 4                                              |
| 113 | ITGB7   | Gut homing receptor beta subunit                                                 |
| 114 | PGF     | Placental growth factor                                                          |
| 115 | TLX1    | T-cell leukemia homeobox protein 1                                               |
| 116 | CCNO    | Cyclin O                                                                         |
| 117 | HSPA6   | Heat shock 70kDa protein 6 (HSP70B')                                             |
| 118 | IL13RA2 | Interleukin-13 receptor subunit alpha-2                                          |
| 119 | ITGB4   | Integrin, beta 4                                                                 |
| 120 | PLA2G3  | Phosphatidylcholine 2-acylhydrolase 3                                            |
| 121 | IL1B    | Interleukin 1, beta                                                              |
| 122 | COL11A1 | Collagen alpha-1(XI) chain                                                       |
| 123 | PLCE1   | 1-phosphatidylinositol 4,5-bisphosphate phosphodiesterase epsilon-1              |
| 124 | COMP    | Cartilage oligomeric matrix protein                                              |
| 125 | MAPK10  | Stress-activated protein kinase JNK3                                             |
| 126 | WNT10A  | Wingless-type MMTV integration site family, member 10A                           |

|     |          |                                                                                         |
|-----|----------|-----------------------------------------------------------------------------------------|
| 127 | WNT3     | Wingless-type MMTV integration site family, member 3                                    |
| 128 | CLCF1    | Cardiotrophin-like cytokine factor 1                                                    |
| 129 | CNTFR    | Ciliary neurotrophic factor receptor subunit alpha                                      |
| 130 | SOX17    | SRY (sex determining region Y)-box 17                                                   |
| 131 | RASAL1   | RAS protein activator like 1 (GAP1 like)                                                |
| 132 | IL15     | Interleukin 15                                                                          |
| 133 | CDKN2B   | Cyclin-dependent kinase inhibitor 2B (p15, inhibits CDK4)                               |
| 134 | MLF1     | Myelodysplasia-myeloid leukemia factor 1                                                |
| 135 | COL3A1   | Collagen alpha-1(III) chain                                                             |
| 136 | FZD9     | Frizzled class receptor 9                                                               |
| 137 | CDH1     | Cadherin 1, type 1, E-cadherin (epithelial)                                             |
| 138 | IGF1     | Insulin-like growth factor 1 (somatomedin C)                                            |
| 139 | FGF20    | Fibroblast growth factor 20                                                             |
| 140 | PDGFRB   | Platelet-derived growth factor receptor, beta polypeptide                               |
| 141 | ZBTB32   | Zinc finger and BTB domain-containing protein 32                                        |
| 142 | FLNC     | Actin-binding-like protein                                                              |
| 143 | PLA2G4A  | Phospholipase A2, group IVA (cytosolic, calcium-dependent)                              |
| 144 | CREB3L3  | Cyclic AMP-responsive element-binding protein 3-like protein 3                          |
| 145 | IL3RA    | Interleukin 3 receptor, alpha (low affinity)                                            |
| 146 | EPHA2    | Tyrosine-protein kinase receptor ECK                                                    |
| 147 | RAC3     | Ras-related C3 botulinum toxin substrate 3 (rho family, small GTP binding protein Rac3) |
| 148 | DDIT3    | Growth arrest and DNA damage-inducible protein GADD153                                  |
| 149 | IL22RA1  | Interleukin-22 receptor subunit alpha-1                                                 |
| 150 | CXXC4    | Inhibition of the Dvl and axin complex protein                                          |
| 151 | MPL      | MPL proto-oncogene, thrombopoietin receptor                                             |
| 152 | STAT3    | Signal transducer and activator of transcription 3 (acute-phase response factor)        |
| 153 | TLR2     | Toll/interleukin-1 receptor-like protein 4                                              |
| 154 | MMP7     | Matrix metalloproteinase 7 (matrilysin, uterine)                                        |
| 155 | WNT2B    | Wingless-type MMTV integration site family, member 2B                                   |
| 156 | MMP3     | Matrix metalloproteinase 3 (stromelysin 1, progelatinase)                               |
| 157 | ETV1     | ETS translocation variant 1                                                             |
| 158 | CACNA1H  | Calcium channel, voltage-dependent, T type, alpha 1H subunit                            |
| 159 | GNA11    | Guanine nucleotide binding protein (G protein), alpha 11 (Gq class)                     |
| 160 | PPARGC1A | Peroxisome proliferator-activated receptor gamma, coactivator 1 alpha                   |
| 161 | IFNA17   | Interferon, alpha 17                                                                    |
| 162 | ID1      | Inhibitor of DNA binding 1, dominant negative helix-loop-helix protein                  |
| 163 | B2M      | Beta-2-microglobulin                                                                    |
| 164 | PRKAA2   | 5'-AMP-activated protein kinase catalytic subunit alpha-2                               |
| 165 | FGF16    | Fibroblast growth factor 16                                                             |
| 166 | FGF1     | Fibroblast growth factor 1 (acidic)                                                     |
| 167 | HDAC11   | Histone deacetylase 11                                                                  |
| 168 | NFKBIZ   | Nuclear factor of kappa light polypeptide gene enhancer in B-cells inhibitor, zeta      |

|     |          |                                                                      |
|-----|----------|----------------------------------------------------------------------|
| 169 | NOG      | Noggin                                                               |
| 170 | CSF3R    | Colony stimulating factor 3 receptor (granulocyte)                   |
| 171 | SPP1     | Secreted phosphoprotein 1                                            |
| 172 | DLL3     | Drosophila Delta homolog 3                                           |
| 173 | CHEK2    | Serine/threonine-protein kinase Chk2                                 |
| 174 | CALML6   | Calglandulin-like protein                                            |
| 175 | CDKN2D   | Cyclin-dependent kinase inhibitor 2D (p19, inhibits CDK4)            |
| 176 | EIF4EBP1 | Phosphorylated heat- and acid-stable protein regulated by insulin 1  |
| 177 | DNMT1    | DNA (cytosine-5-)-methyltransferase 1                                |
| 178 | FGF8     | Fibroblast growth factor 8 (androgen-induced)                        |
| 179 | LEPR     | Leptin receptor                                                      |
| 180 | ITGA9    | Integrin alpha-RLC                                                   |
| 181 | FLNA     | Endothelial actin-binding protein                                    |
| 182 | COL4A5   | Collagen alpha-5(IV) chain                                           |
| 183 | FGF11    | Fibroblast growth factor homologous factor 3                         |
| 184 | WNT5A    | Wingless-type MMTV integration site family, member 5A                |
| 185 | RASA4    | Calcium-promoted Ras inactivator                                     |
| 186 | MAD2L2   | Mitotic spindle assembly checkpoint protein MAD2B                    |
| 187 | FOS      | FBJ murine osteosarcoma viral oncogene homolog                       |
| 188 | NFKB1    | Nuclear factor of kappa light polypeptide gene enhancer in B-cells 1 |
| 189 | LIG4     | Polydeoxyribonucleotide synthase [ATP] 4                             |

---
