# Supplementary material for: Gene Expression Profiles Identify Biomarkers of Resistance to Decitabine in Myelodysplastic Syndromes
Source: MDPI journal article supplement (doi:10.3390/cells10123494), 2021-12-10
Supplement: s1 [file s1]

**Table S6. Expression levels of 38 genes in bone marrow from MDS patients.**

| Gene Name | Patients (2- $\Delta\Delta CT$ ) |      |      |       |
|-----------|----------------------------------|------|------|-------|
|           | 1                                | 2    | 3    | 4     |
| TUBB3     | 2.11                             | 1.14 | 0.65 | 1.53  |
| SHH       | 0.62                             | 0.64 | 0.45 | 0.07  |
| AMER1     | 0.44                             | 0.94 | 0.61 | 0.86  |
| LMX1B     | 0.80                             | 1.37 | 0.63 | 0.56  |
| GFI1      | 1.27                             | 1.84 | 0.92 | 0.77  |
| IL12B     | 1.58                             | 1.32 | 0.85 | 0.75  |
| ETS1      | 1.66                             | 0.70 | 0.66 | 0.83  |
| HSPA2     | 1.07                             | 0.56 | 0.99 | 0.81  |
| RELN      | 0.17                             | 1.49 | 0.42 | 0.62  |
| AKT3      | 15.94                            | 1.95 | 4.98 | 98.37 |
| STAT3     | 1.62                             | 1.08 | 0.82 | 4.24  |
| ID2       | 1.05                             | 0.96 | 0.87 | 1.20  |
| CDKN2A    | 1.00                             | 0.52 | 0.66 | 0.68  |
| GNA11     | 0.68                             | 0.83 | 0.87 | 0.58  |
| BCL2      | 1.28                             | 0.90 | 1.35 | 0.61  |
| ID1       | 1.17                             | 1.33 | 0.52 | 0.55  |
| MAPK10    | 1.28                             | 0.97 | 0.92 | 0.60  |
| KMT2E     | 0.40                             | 1.13 | 0.40 | 0.64  |
| DLC1      | 1.13                             | 1.03 | 0.73 | 0.72  |
| PRKAA2    | 1.08                             | 1.26 | 1.28 | 0.80  |
| SPP1      | 0.67                             | 1.03 | 0.83 | 0.43  |
| CDKN2D    | 1.12                             | 0.58 | 0.97 | 5.25  |
| DNMT1     | 0.52                             | 1.15 | 0.53 | 0.8   |
| NOTCH1    | 2.76                             | 0.70 | 1.09 | 1.63  |
| ITGA9     | 0.39                             | 1.86 | 0.32 | 0.79  |
| FGF11     | 0.18                             | 1.03 | 0.20 | 0.19  |
| KL        | 0.73                             | 1.04 | 0.85 | 0.57  |
| MET       | 1.52                             | 1.67 | 1.14 | 0.86  |
| CR1       | 2.44                             | 0.99 | 0.75 | 1.53  |
| CDKN1A    | 1.10                             | 0.91 | 0.95 | 0.95  |
| TNFRSF10B | 0.13                             | 1.28 | 0.12 | 0.17  |
| NFKB1     | 2.12                             | 1.98 | 1.41 | 1.34  |
| FOS       | 10.82                            | 0.89 | 4.51 | 9.05  |
| MLF1      | 1.33                             | 1.48 | 0.88 | 0.79  |
| BCL2A1    | 1.04                             | 1.09 | 1.02 | 0.80  |
| RUNX1T1   | 0.98                             | 1.15 | 0.93 | 0.90  |
| EGF       | 1.79                             | 1.58 | 3.20 | 2.61  |
| LIG4      | 1.10                             | 0.98 | 0.85 | 0.62  |

All expression were performed in triplicate, and value are significant at the  $p < 0.05$  level.
