# Supplementary material for: Gene Expression Profiles Identify Biomarkers of Resistance to Decitabine in Myelodysplastic Syndromes
Source: Cells. 2021 Dec 10;10(12):3494. doi: 10.3390/cells10123494 (PMC8700444; doi:10.3390/cells10123494)
Supplement: Supplementary file 1 [file cells-10-03494-s001.zip]

Archive with 6 entries (6 files):
- Table S1_primer 38.pdf
- Table S2_189 genes.pdf
- Table S3_30 genes.pdf
- Table S4_gene string 54.pdf
- Table S5_function 38.pdf
- Table S6_38 genes in bone marrow.pdf
